# Supplementary material for: Serine Palmitoyltransferase Gene Silencing Prevents Ceramide Accumulation and Insulin Resistance in Muscles in Mice Fed a High-Fat Diet
Source: MDPI journal article supplement (doi:10.3390/cells11071123), 2022-03-26

## Supplementary Figures

The sequence of application the samples into the gel wells was individually set for particular proteins.

**Figure S1** Full unedited gel for Figure SPTLC. The sequence of application the samples into the gel wells: 1-4 lane –LFD sample, 5-8 lane – HFD+Sptlc2 sample, 22-25 lane – HFD *Sptlc2*-shRNA sample, 26 lane – Protein standard, the rest of the lane – other samples (not analyzed).

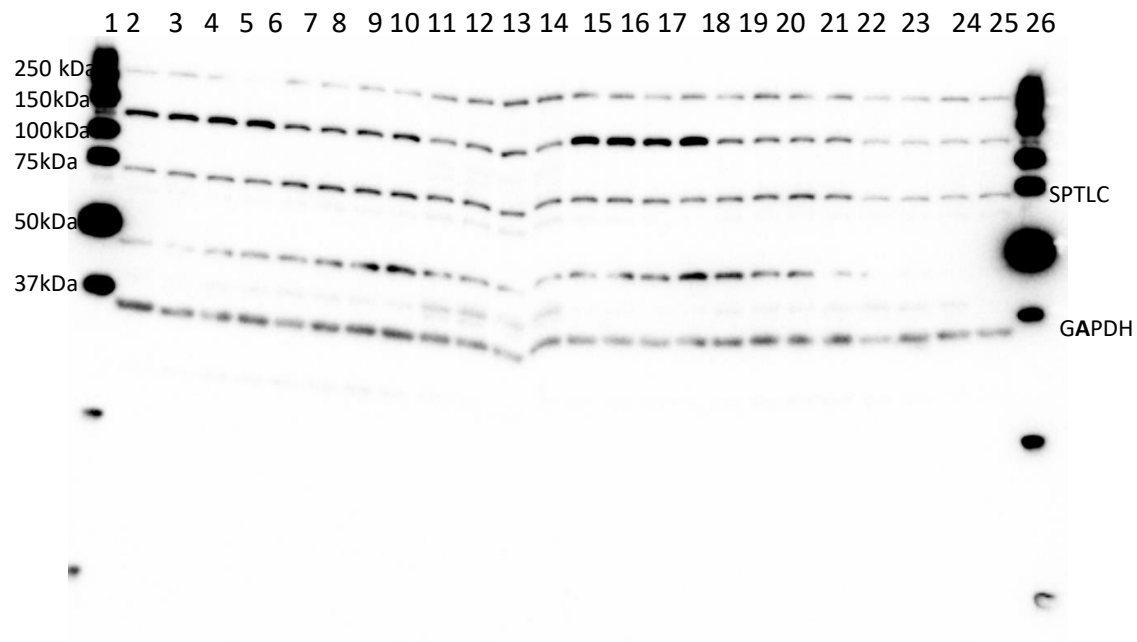

**Figure S2** Full unedited gel for Figure pAkt(S473)/Akt. The sequence of application the samples into the gel wells: 1 lane – Protein standard, 2-5 lane – LFD sample, 6-9 lane – HFD+Sptlc2 sample, 22-25 lane – HFD Sptlc2-shRNA sample, 26 lane – Protein standard, the rest of the lane – other samples (not analyzed).

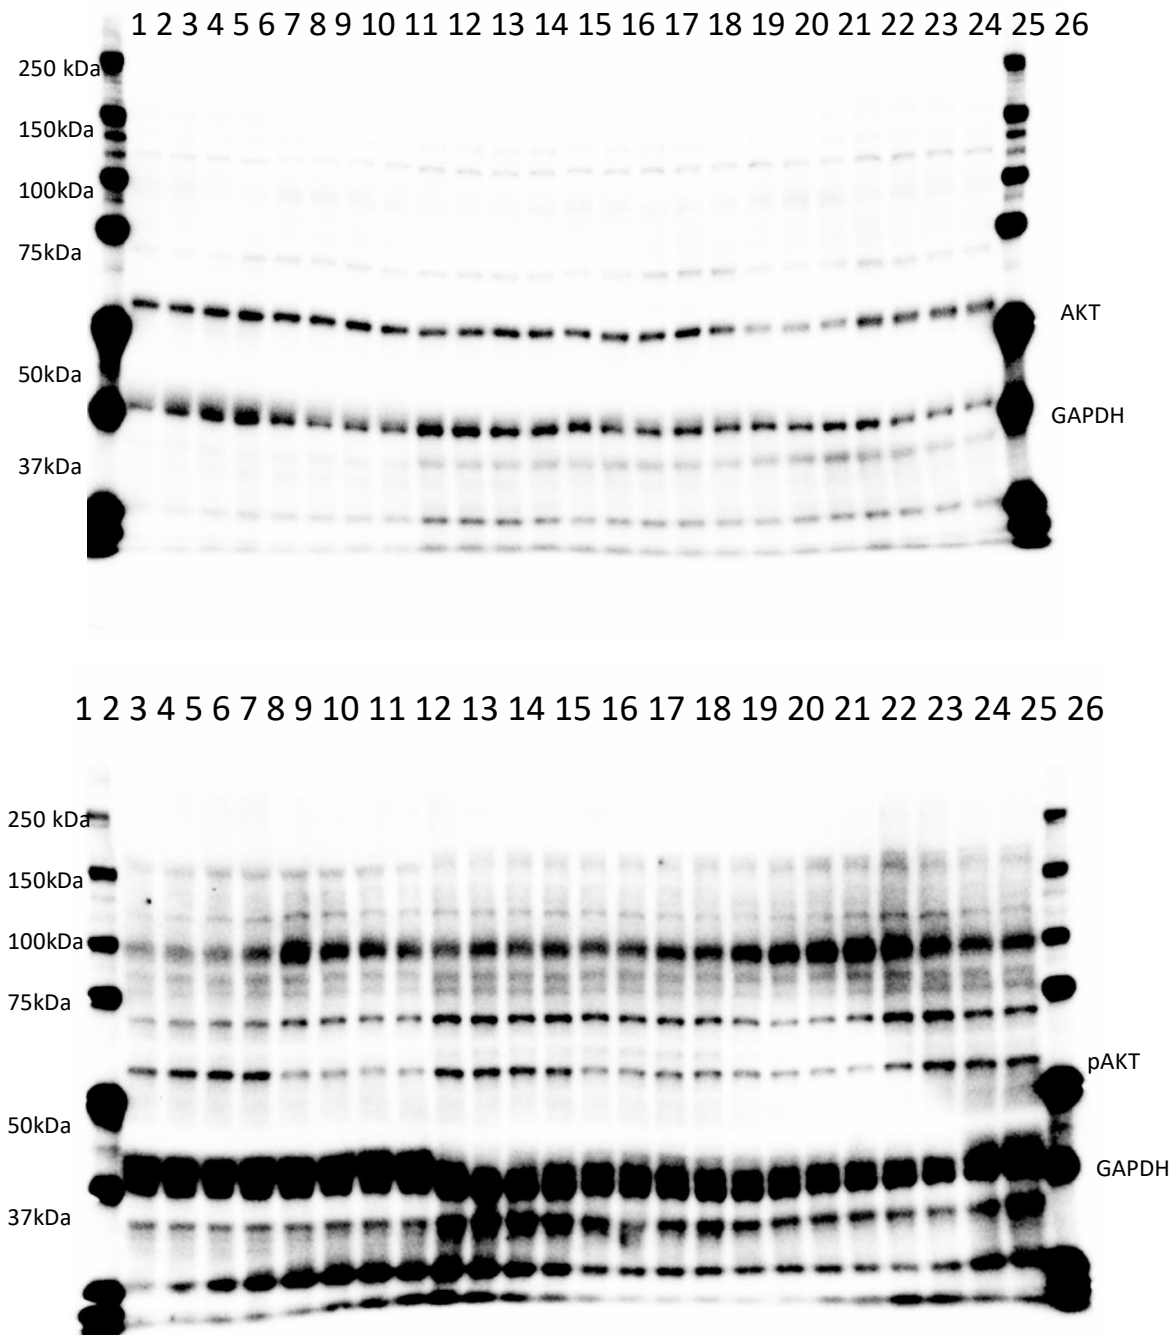

**Figure S3** Full unedited gel for Figure CPT1B. **The sequence of application the samples into the gel wells:**  
 1 lane – Protein standard, 2-5 lane – LFD sample, 6-9 lane – HFD+Sptlc2 sample, 18-21 lane – HFD Sptlc2-shRNA sample, 26 lane – Protein standard, the rest of the lane – other samples (not analyzed).

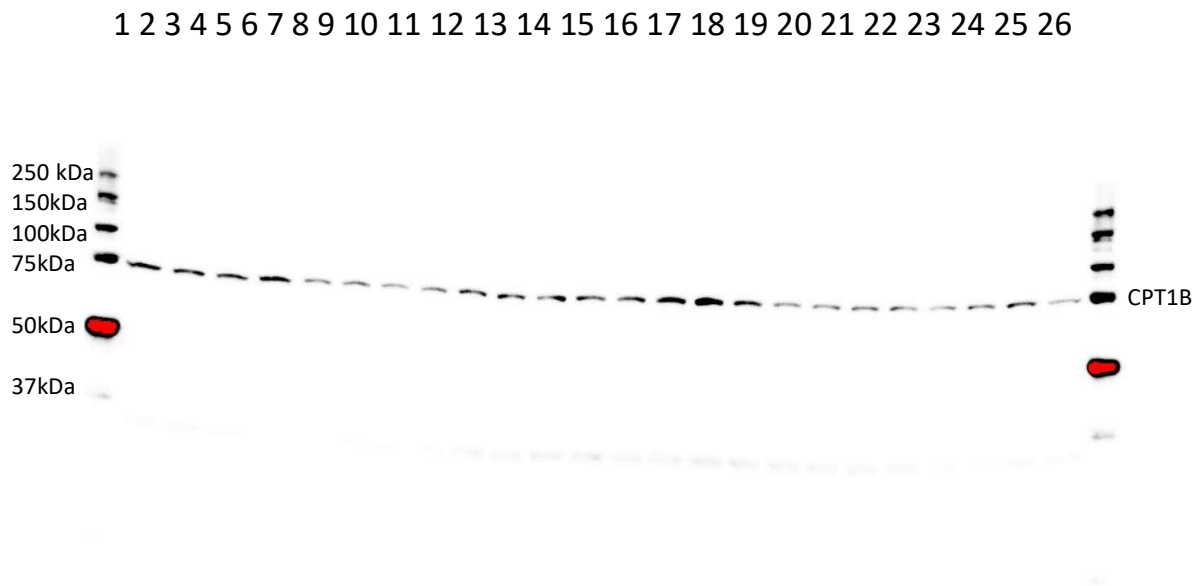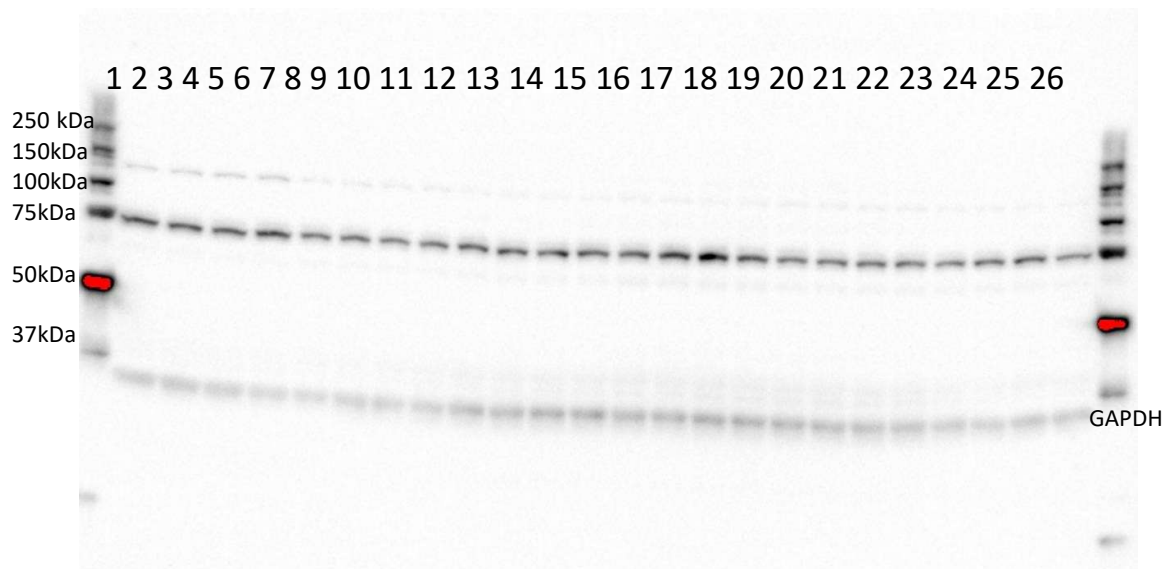

**Figure S4** Full unedited gel for Figure FABPpm. **The sequence of application the samples into the gel wells:**  
 1 lane – Protein standard, 2-5 lane – LFD sample, 6-9 lane – HFD+Sptlc2 sample, 18-21 lane – HFD Sptlc2-shRNA sample, the rest of the lane – other samples (not analyzed).

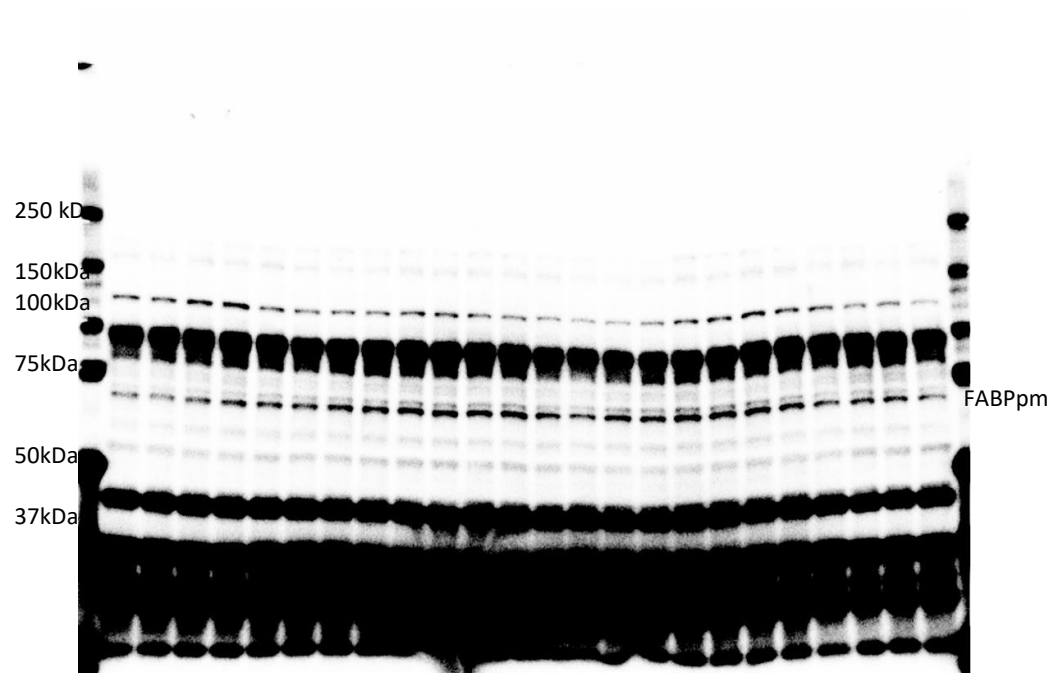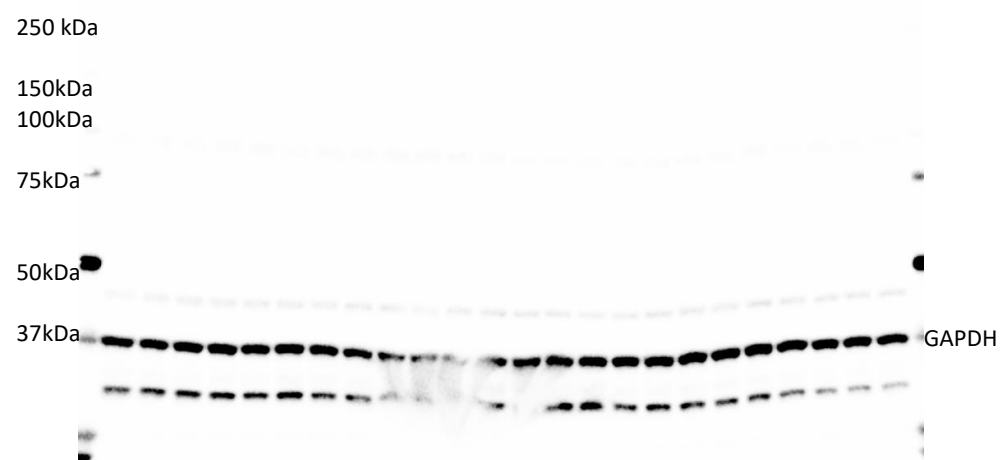

**Figure S5** Full unedited gel for Figure GLUT4. **The sequence of application the samples into the gel wells:**  
 1 lane – Protein standard, 2-5 lane – LFD sample, 6-9 lane – HFD+Sptlc2 sample, 18-21 lane – HFD Sptlc2-shRNA sample, 26 lane – Protein standard, the rest of the lane – other samples (not analyzed).

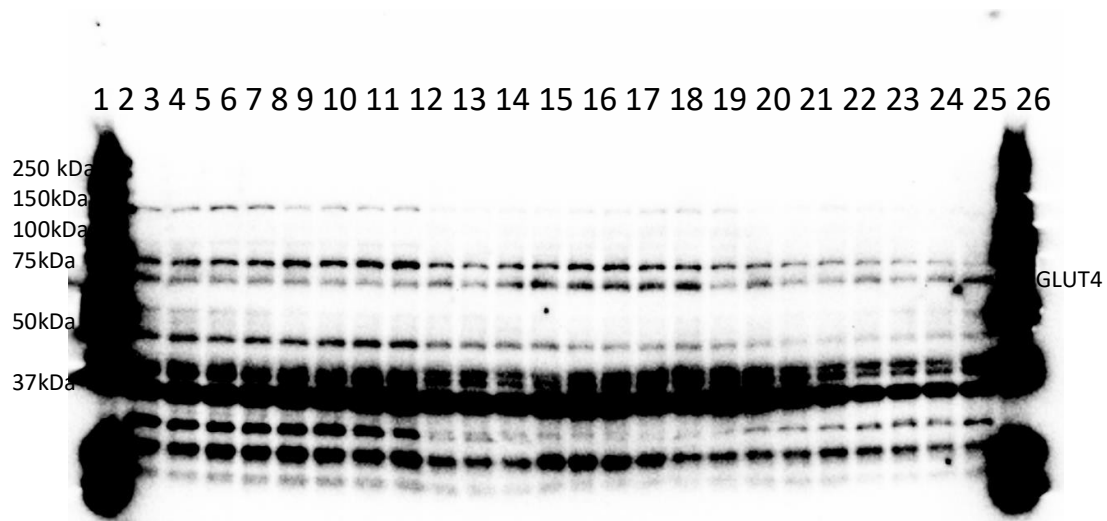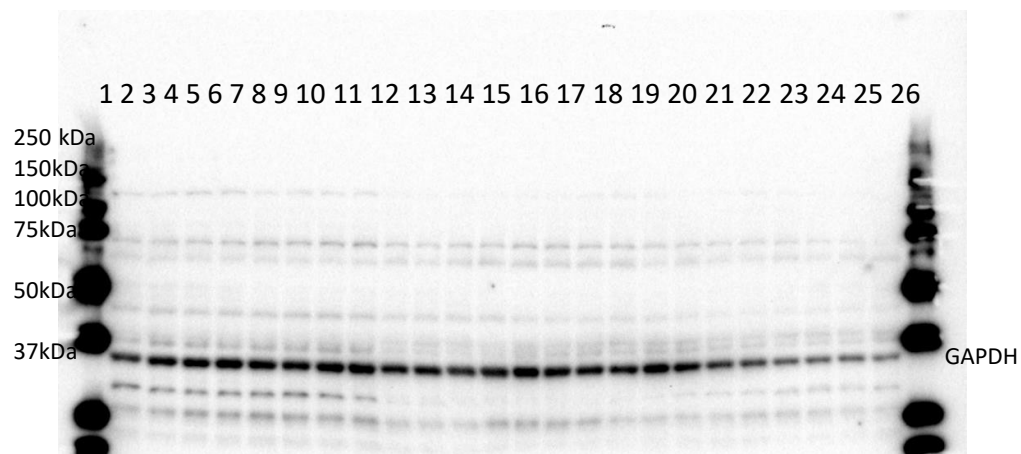

**Figure S6** Full unedited gel for Figure FATP1. **The sequence of application the samples into the gel wells: 1**  
lane – Protein standard, 2-5 lane – LFD sample, 6-9 lane – HFD+Sptlc2 sample, 18-21 lane – HFD Sptlc2-shRNA  
sample, 26 lane – Protein standard, the rest of the lane – other samples (not analyzed).

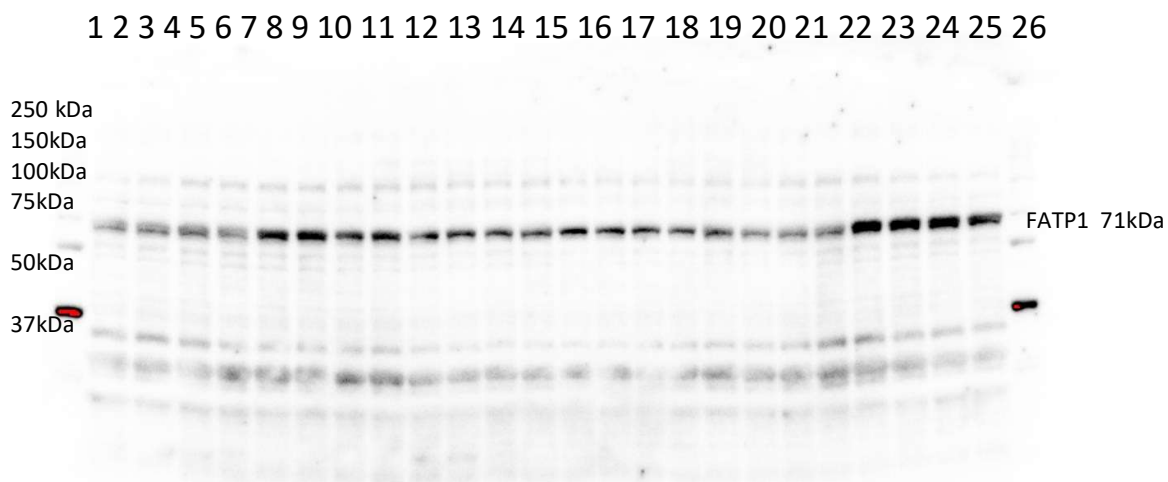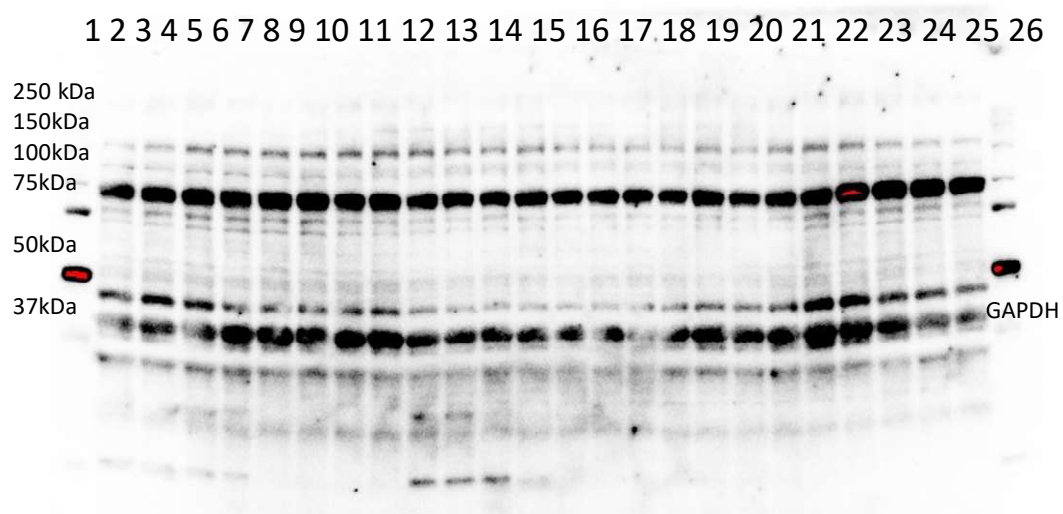

**Figure S7** Full unedited gel for Figure CD36. **The sequence of application the samples into the gel wells:** 1 lane – Protein standard, 2-5 lane – HFD+Sptlc2 sample, 6-9 lane – LFD sample, 18-21 lane – HFD *Sptlc2*-shRNA sample, 26 lane – Protein standard, the rest of the lane – other samples (not analyzed).

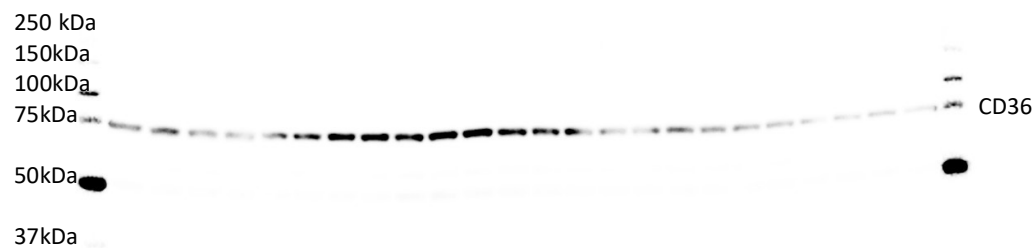

**Figure S8** Full unedited gel for Figure PI3K. **The sequence of application the samples into the gel wells:** 1 lane – Protein standard, 2-5 lane – LFD sample, 6-9 lane – HFD+Sptlc2 sample, 18-21 lane – HFD *Sptlc2*-shRNA sample, 26 lane – Protein standard, the rest of the lane – other samples (not analyzed).

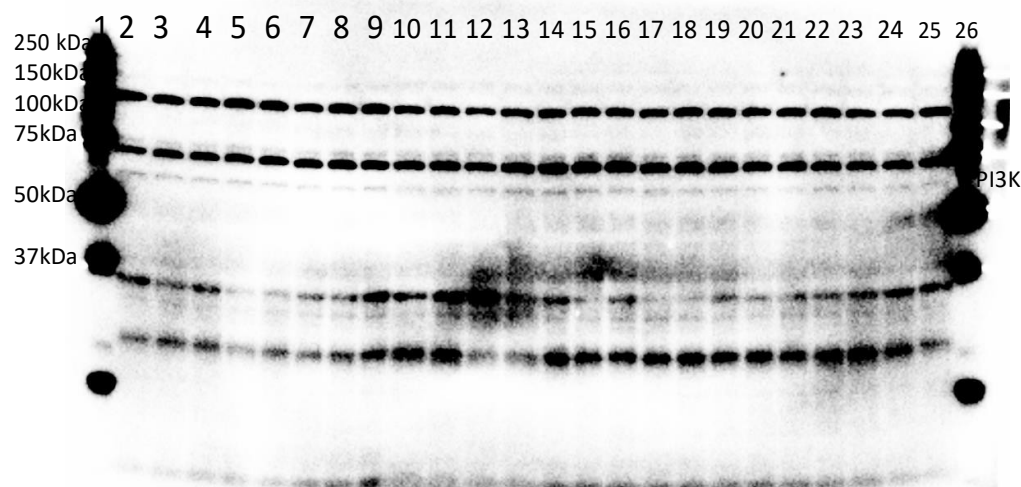

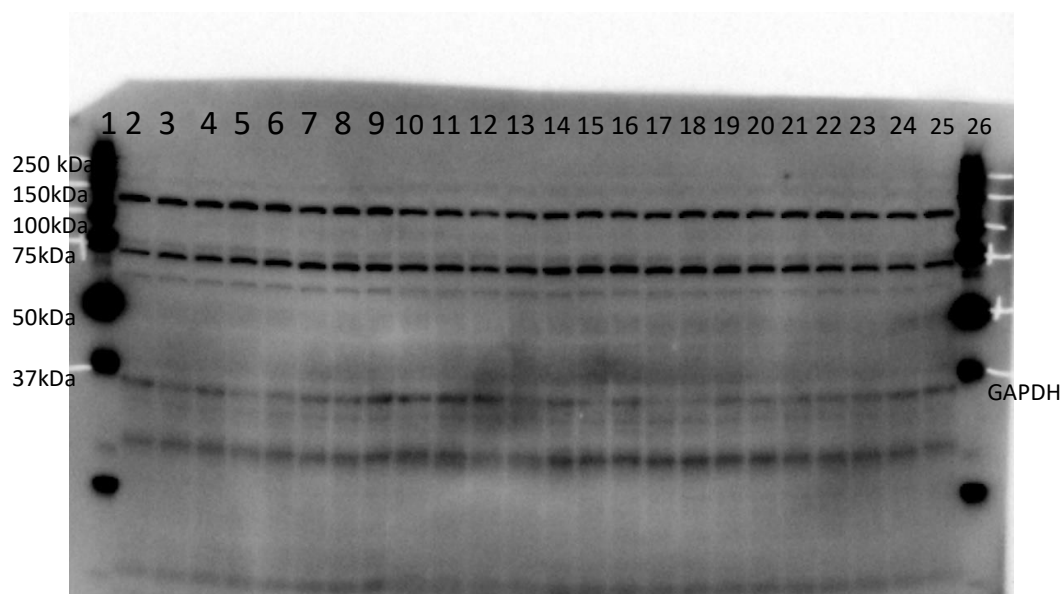

**Figure S9** Full unedited gel for Figure pIRS-1(S1101)/IRS-1 and IRS1/pIRS-1(Y632) . **The sequence of application the samples into the gel wells:** 1 lane – Protein standard, 2-5 lane – LFD sample, 6-9 lane – HFD+Sptlc2 sample, 22-25 lane – HFD<sub>Sptlc2-shRNA</sub> sample, 26 lane – Protein standard, the rest of the lane – other samples (not analyzed).

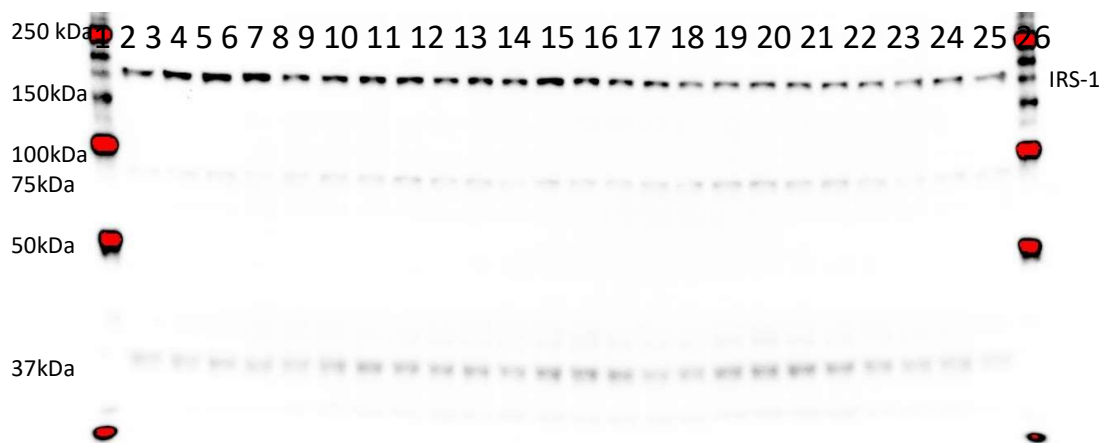



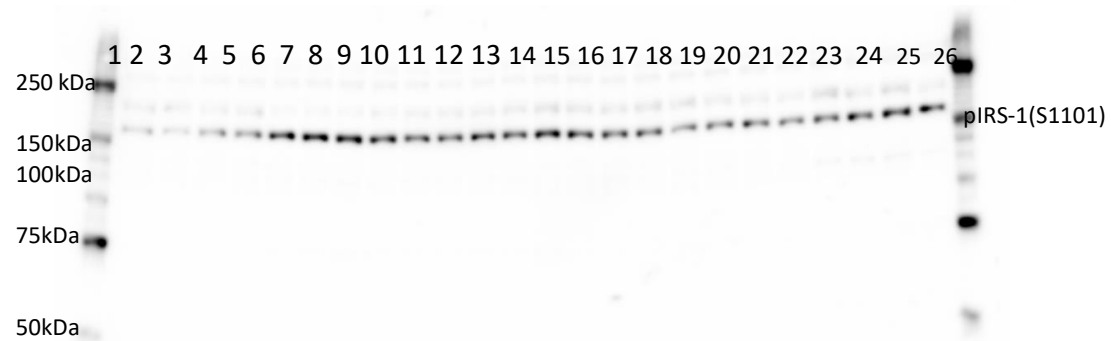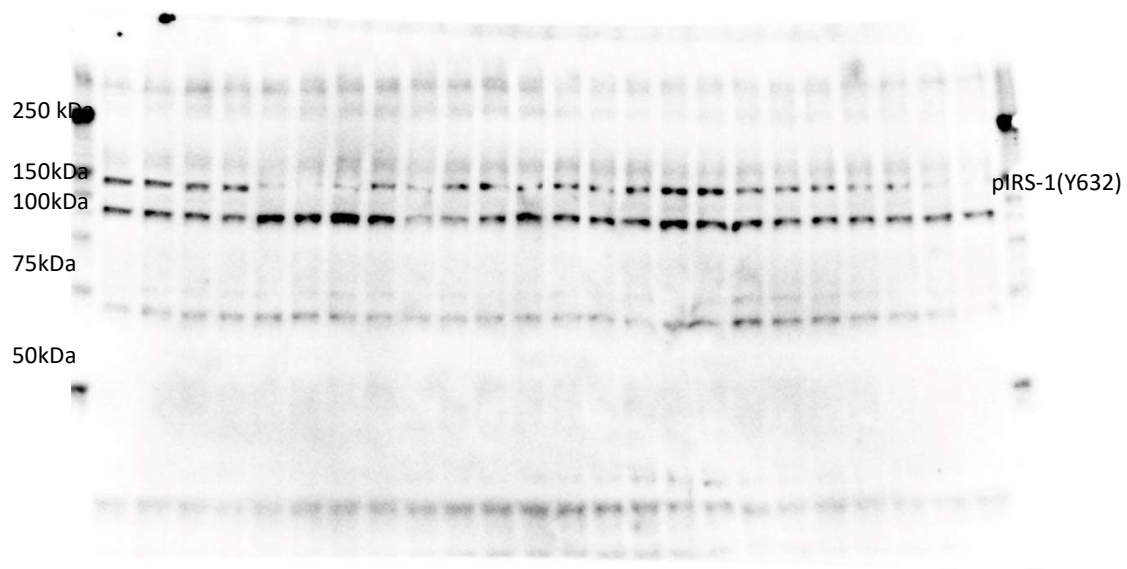

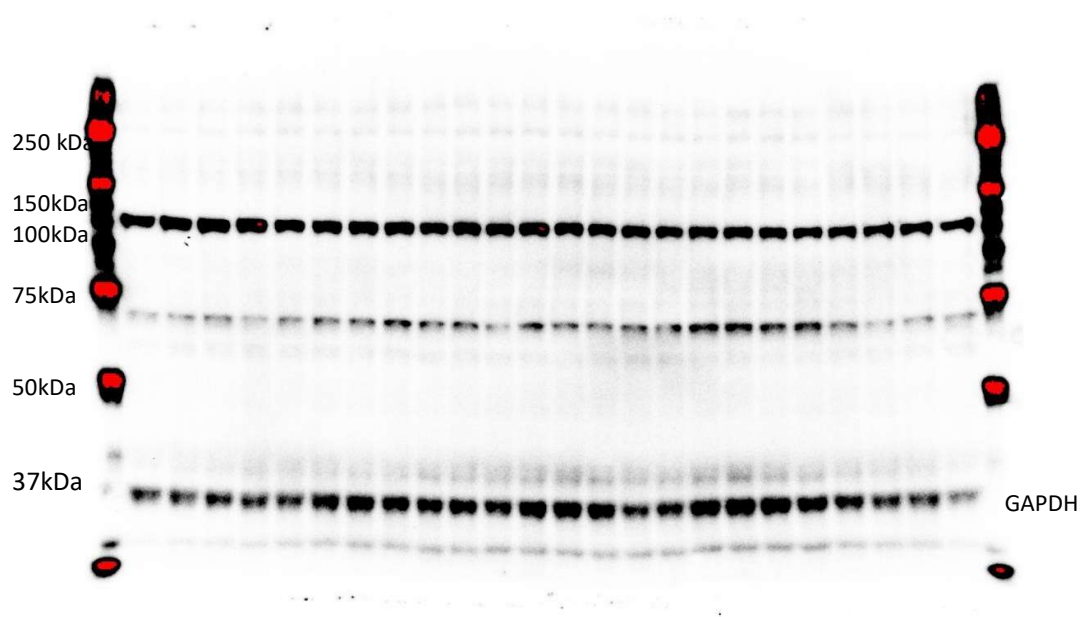

Supplement: s1 [file s1]
